# Supplementary material
Source: HighWire-hosted journal article supplement (https://gut.bmj.com/content/68/6/1088)
Supplement: inline-supplementary-material-1 [file inline-supplementary-material-1.pdf]

**Supplementary Methods:** details on the multiple imputation process

|                                                            | <b>Multiple imputation</b>                                                                                                                                                                                                                                                                                                                                                                                                                                                                  |
|------------------------------------------------------------|---------------------------------------------------------------------------------------------------------------------------------------------------------------------------------------------------------------------------------------------------------------------------------------------------------------------------------------------------------------------------------------------------------------------------------------------------------------------------------------------|
| Software used                                              | R version 3.4.1                                                                                                                                                                                                                                                                                                                                                                                                                                                                             |
| Imputation method and key settings                         | Fully conditional specification (package mice version 2.25);<br>maximum iterations: 50                                                                                                                                                                                                                                                                                                                                                                                                      |
| No. of imputed data sets created                           | 10                                                                                                                                                                                                                                                                                                                                                                                                                                                                                          |
| Analyses variables                                         | total cholesterol; triglycerides; high density lipoprotein cholesterol; body mass index; glucose; weight; physical activity; smoking status; systolic blood pressure; diastolic blood pressure; ethnicity; education level; alcohol consumption; fat intake; waist circumference; kilocalorie intake; Dutch healthy diet index; age; anti-diabetic drugs; lipid-lowering drugs; antihypertensive drugs; fibre intake; study cohort, gender, steatosis, protein intake, carbohydrate intake; |
| Auxiliary variables                                        | aspartate transaminase; alanine transaminase; homeostasis model assessment of insulin resistance; hip circumference; heart rate; spleen size; calcium intake; creatinine; glomerular filtration rate; vitamin E intake; potassium intake; magnesium intake; phosphorus intake; gamma-glutamyl transferase                                                                                                                                                                                   |
| Treatment of not normally distributed continuous variables | Predictive mean matching                                                                                                                                                                                                                                                                                                                                                                                                                                                                    |
| Treatment of normally distributed variables                | Linear regression                                                                                                                                                                                                                                                                                                                                                                                                                                                                           |
| Treatment of binary/categorical variables                  | (Proportional odds) logistic regression                                                                                                                                                                                                                                                                                                                                                                                                                                                     |
| Population                                                 | For the imputation we used reliable and completed FFQs. In addition participants had to have less than 30% missing on study variables. Imputed population (n=4.754).                                                                                                                                                                                                                                                                                                                        |

**Supplementary Table 1: Imputation Characteristics**

|                                   | Original Data<br>n=3882 | Imputed data*      |
|-----------------------------------|-------------------------|--------------------|
| <b>Demographics</b>               |                         |                    |
| Age (years)                       | 69.7 ± 8.8              | no missing data    |
| Female (%)                        | 58.3                    | no missing data    |
| Caucasian (%)                     | 97.7                    | 97.6               |
| <u>Education Level (%)</u>        |                         |                    |
| Low                               | 48.4                    | 48.4               |
| Intermediate                      | 30.3                    | 30.2               |
| High                              | 21.3                    | 21.3               |
| <u>Smoking status (%)</u>         |                         |                    |
| Never / Past or Current           | 36.7 / 63.3             | 36.1 / 63.9        |
| Alcohol (units/d)                 | 0.45 (0.05 – 1.20)      | no missing data    |
| Physical Activity <sup>†</sup>    | 41.3 (15.8 – 78.6)      | 40.6 (15.7 – 77.6) |
| Caloric Intake (kcal/day)         | 2031 (1620 – 2515)      | no missing data    |
| <b>Physical examination</b>       |                         |                    |
| <u>BMI (kg/m<sup>2</sup>)</u>     |                         |                    |
| Lean                              | 26.9 (24.5 – 29.7)      | 26.9 (24.5 – 29.7) |
| Overweight                        | 30.2                    | 30.2               |
| Obese                             | 46.7                    | 46.7               |
| <u>WC (cm)</u>                    |                         |                    |
| Men                               | 23.0                    | 23.0               |
| Women                             | 98.2 ± 10.6             | 98.2 ± 10.6        |
|                                   | 89.1 ± 12.2             | no missing data    |
| <b>Biochemistry</b>               |                         |                    |
| AST (U/L)                         | 24 (21 – 28)            | 24 (21 – 28)       |
| ALT (U/L)                         | 18 (15 – 24)            | 18 (15 – 24)       |
| GGT (U/L)                         | 23 (17 – 34)            | 23 (17 – 34)       |
| Platelets (*10 <sup>9</sup> /L)   | 262 (223 – 305)         | 262 (223 – 305)    |
| HOMA-IR                           | 2.6 (1.7 – 4.1)         | 2.6 (1.7 – 4.1)    |
| Total Cholesterol (mmol/L)        | 5.4 ± 1.1               | 5.4 ± 1.1          |
| HDL-C (mmol/L)                    | 1.5 ± 0.4               | 1.5 ± 0.4          |
| Triglycerides (mmol/L)            | 1.3 (1.0 – 1.7)         | 1.3 (1.0 – 1.7)    |
| <b>Comorbidities</b>              |                         |                    |
| <u>Metabolic Syndrome (%)</u>     |                         |                    |
| - WC>88cm (♀) or >120cm(♂)        | 51.9                    | 51.9               |
| - Triglycerides >150mg/dL         | 43.2                    | 43.2               |
| - HDL-C <40mg/dL(♂) or 50mg/dL(♀) | 46.2                    | 46.0               |
| - Blood pressure ≥130/85mmHg      | 44.8                    | 44.7               |
| - FPG>100mg/dL                    | 84.3                    | 84.3               |
|                                   | 41.5                    | 41.5               |
| Diabetes Mellitus (%)             | 41.5                    | 41.5               |
| Hypertension (%)                  | 13.2                    | 13.1               |
|                                   | 74.0                    | 74.0               |
| NAFLD (%)                         | 34.4                    | no missing data    |

\*Pooled data based on 10 imputations represent % for categorical variables and for continuous variables mean ± SD or median (P25-P75).<sup>†</sup>Physical activity in metabolic equivalent task hours/week.

**Supplementary Table 2:** Absolute macronutrient consumption in grams and energy percent per quartile

|                                  | <b>Quartile 1</b> | <b>Quartile 2</b> | <b>Quartile 3</b> | <b>Quartile 4</b> |
|----------------------------------|-------------------|-------------------|-------------------|-------------------|
| <b>Total Protein</b>             |                   |                   |                   |                   |
| in grams per Q                   | 74.0 ± 24.6       | 81.5 ± 25.0       | 85.0 ± 26.2       | 86.3 ± 31.0       |
| in energy % per Q                | 12.4 ± 1.5        | 14.8 ± 0.47       | 16.4 ± 0.49       | 19.5 ± 2.2        |
| <b>Animal protein</b>            |                   |                   |                   |                   |
| in grams per Q                   | 35.2 ± 14.3       | 46.3 ± 14.5       | 51.4 ± 15.7       | 61.1 ± 23.6       |
| in energy % per Q                | 5.9 ± 1.3         | 8.3 ± 0.48        | 10.1 ± 0.58       | 13.6 ± 2.6        |
| <b>Vegetable protein</b>         |                   |                   |                   |                   |
| in grams per Q                   | 26.0 ± 9.9        | 31.2 ± 10.2       | 34.3 ± 10.7       | 41.7 ± 15.8       |
| in energy % per Q                | 4.7 ± 0.68        | 5.9 ± 0.23        | 6.7 ± 0.24        | 8.1 ± 0.93        |
| <b>Total Fat</b>                 |                   |                   |                   |                   |
| in grams per Q                   | 54.2 ± 20.1       | 67.8 ± 21.8       | 80.4 ± 25.6       | 108.1 ± 57.8      |
| in energy % per Q                | 24.4 ± 3.0        | 30.0 ± 1.2        | 33.9 ± 1.2        | 41.3 ± 6.7        |
| <b>Saturated fat</b>             |                   |                   |                   |                   |
| in grams per Q                   | 19.0 ± 6.9        | 24.5 ± 8.2        | 29.0 ± 9.6        | 38.9 ± 19.4       |
| in energy % per Q                | 8.3 ± 1.1         | 10.6 ± 0.48       | 12.3 ± 0.55       | 15.6 ± 2.6        |
| <b>MUFA fat</b>                  |                   |                   |                   |                   |
| in grams per Q                   | 17.3 ± 6.7        | 22.5 ± 7.6        | 27.0 ± 8.0        | 39.9 ± 24.8       |
| in energy % per Q                | 7.8 ± 1.1         | 10.0 ± 0.43       | 11.5 ± 0.48       | 14.9 ± 3.5        |
| <b>PUFA fat</b>                  |                   |                   |                   |                   |
| in grams per Q                   | 10.0 ± 4.0        | 13.5 ± 4.6        | 16.6 ± 5.3        | 24.2 ± 14.2       |
| in energy % per Q                | 4.5 ± 0.65        | 5.9 ± 0.31        | 7.0 ± 0.33        | 9.3 ± 2.3         |
| <b>Trans fatty acid</b>          |                   |                   |                   |                   |
| in grams per Q                   | 0.74 ± 0.31       | 1.07 ± 0.36       | 1.32 ± 0.44       | 1.92 ± 0.92       |
| in energy % per Q                | 0.33 ± 0.07       | 0.46 ± 0.03       | 0.56 ± 0.03       | 0.76 ± 0.15       |
| <b>Total Carbohydrate</b>        |                   |                   |                   |                   |
| in grams per Q                   | 194.3 ± 75.9      | 233.1 ± 75.9      | 255.1 ± 79.0      | 289.8 ± 103.4     |
| in energy % per Q                | 36.9 ± 5.2        | 44.1 ± 1.2        | 48.4 ± 1.3        | 54.9 ± 3.5        |
| <b>Mono- &amp; disaccharides</b> |                   |                   |                   |                   |
| in grams per Q                   | 75.1 ± 34.7       | 107.9 ± 37.0      | 134.0 ± 42.6      | 174.3 ± 64.0      |
| in energy % per Q                | 14.3 ± 3.2        | 20.6 ± 1.3        | 25.1 ± 1.4        | 32.7 ± 4.4        |
| <b>Polysaccharides</b>           |                   |                   |                   |                   |
| in grams per Q                   | 91.3 ± 36.4       | 115.0 ± 37.9      | 126.6 ± 40.6      | 148.2 ± 53.6      |
| in energy % per Q                | 16.8 ± 2.8        | 21.3 ± 0.85       | 24.2 ± 0.93       | 29.4 ± 3.3        |
| <b>Fibre</b>                     |                   |                   |                   |                   |
| in grams per Q                   | 19.5 ± 7.5        | 25.4 ± 8.7        | 29.5 ± 9.5        | 36.0 ± 13.1       |
| in energy % per Q                | 1.8 ± 0.30        | 2.4 ± 0.13        | 2.8 ± 0.14        | 3.6 ± 0.48        |

Mean energy intake in grams or energy% (±SD) per quartile.

**Supplementary Table 3:** Stratified stepwise logistic regression models with macronutrient as independent variables and NAFLD as dependent variable using quartile 1 as reference

| <b>Lean (BMI &lt; 25 kg/m<sup>2</sup>) n=1174</b> |                                       |                    |                           |                          |                                         |
|---------------------------------------------------|---------------------------------------|--------------------|---------------------------|--------------------------|-----------------------------------------|
|                                                   | <b>Q2</b>                             | <b>Q3</b>          | <b>Q4</b>                 | <b>P for trend</b>       | <b>Continuous<br/>(per SD increase)</b> |
| <b>Model 1 (Sociodemographic)</b>                 |                                       |                    |                           |                          |                                         |
| <u>Total protein</u>                              | 1.10 (0.69 – 1.77)                    | 0.91 (0.54 – 1.53) | 1.08 (0.64 – 1.84)        | 0.965                    | 0.99 (0.82 – 1.20)                      |
| Animal protein                                    | <b>1.75 (1.09 – 2.81)<sup>†</sup></b> | 0.94 (0.52 – 1.70) | 1.33 (0.76 – 2.35)        | 0.718                    | 1.00 (0.82 – 1.22)                      |
| Vegetable protein                                 | 1.00 (0.60 – 1.68)                    | 0.85 (0.50 – 1.45) | 0.78 (0.45 – 1.36)        | 0.304                    | 0.92 (0.75 – 1.12)                      |
| <u>Total carbohydrate</u>                         | 1.05 (0.64 – 1.74)                    | 0.72 (0.42 – 1.23) | 0.66 (0.38 – 1.16)        | 0.075                    | 0.84 (0.69 – 1.02)                      |
| Mono-disaccharide                                 | 0.73 (0.44 – 1.21)                    | 0.64 (0.38 – 1.09) | <b>0.55 (0.31 – 0.98)</b> | <b>0.038</b>             | 0.82 (0.66 – 1.01)                      |
| Polysaccharide                                    | 1.13 (0.66 – 1.93)                    | 1.19 (0.69 – 2.04) | 0.70 (0.37 – 1.32)        | 0.354                    | 0.95 (0.76 – 1.17)                      |
| Fibre                                             | 0.69 (0.41 – 1.17)                    | 0.65 (0.38 – 1.09) | 0.68 (0.38 – 1.22)        | 0.173                    | 0.94 (0.75 – 1.17)                      |
| <u>Total fat</u>                                  | 0.97 (0.55 – 1.71)                    | 1.42 (0.83 – 2.43) | <b>1.70 (1.01 – 2.87)</b> | <b>0.017<sup>†</sup></b> | 1.16 (0.98 – 1.37)                      |
| Saturated fat                                     | 1.03 (0.57 – 1.84)                    | 1.22 (0.66 – 2.27) | 1.83 (0.89 – 3.77)        | 0.089                    | 1.16 (0.84 – 1.60)                      |
| MUFA                                              | 1.29 (0.72 – 2.29)                    | 1.29 (0.68 – 2.43) | 1.62 (0.77 – 3.39)        | 0.246                    | 1.08 (0.82 – 1.41)                      |
| PUFA                                              | 0.92 (0.54 – 1.57)                    | 0.79 (0.45 – 1.38) | 0.85 (0.46 – 1.55)        | 0.503                    | 0.90 (0.71 – 1.16)                      |
| Trans fatty acid                                  | 0.77 (0.44 – 1.35)                    | 0.76 (0.42 – 1.37) | 1.17 (0.60 – 2.28)        | 0.716                    | 1.02 (0.75 – 1.39)                      |
| <b>Model 2 (Lifestyle Confounding)</b>            |                                       |                    |                           |                          |                                         |
| <u>Total protein</u>                              | 1.08 (0.67 – 1.73)                    | 0.89 (0.52 – 1.50) | 1.02 (0.58 – 1.79)        | 0.869                    | 0.98 (0.81 – 1.20)                      |
| Animal protein                                    | <b>1.69 (1.05 – 2.72)</b>             | 0.93 (0.51 – 1.69) | 1.25 (0.69 – 2.28)        | 0.862                    | 0.98 (0.79 – 1.21)                      |
| Vegetable protein                                 | 1.13 (0.66 – 1.91)                    | 1.03 (0.59 – 1.80) | 0.98 (0.55 – 1.77)        | 0.866                    | 1.00 (0.81 – 1.23)                      |
| <u>Total carbohydrate</u>                         | 1.19 (0.71 – 2.00)                    | 0.88 (0.49 – 1.55) | 0.89 (0.48 – 1.65)        | 0.503                    | 0.93 (0.74 – 1.15)                      |
| Mono-disaccharide                                 | 0.83 (0.49 – 1.40)                    | 0.76 (0.43 – 1.32) | 0.72 (0.38 – 1.36)        | 0.297                    | 0.91 (0.71 – 1.15)                      |
| Polysaccharide                                    | 1.16 (0.68 – 1.98)                    | 1.26 (0.73 – 2.18) | 0.78 (0.40 – 1.49)        | 0.591                    | 0.99 (0.79 – 1.23)                      |
| Fibre                                             | 0.73 (0.43 – 1.25)                    | 0.70 (0.39 – 1.25) | 0.80 (0.41 – 1.57)        | 0.493                    | 1.04 (0.80 – 1.35)                      |
| <u>Total fat</u>                                  | 1.01 (0.57 – 1.78)                    | 1.46 (0.84 – 2.54) | 1.75 (0.99 – 3.08)        | <b>0.024</b>             | 1.15 (0.95 – 1.38)                      |
| Saturated fat                                     | 1.01 (0.56 – 1.83)                    | 1.21 (0.64 – 2.28) | 1.92 (0.91 – 4.06)        | 0.080                    | 1.18 (0.84 – 1.65)                      |
| MUFA                                              | 1.23 (0.69 – 2.20)                    | 1.25 (0.66 – 2.36) | 1.50 (0.71 – 3.18)        | 0.334                    | 1.03 (0.78 – 1.36)                      |
| PUFA                                              | 0.95 (0.56 – 1.64)                    | 0.85 (0.48 – 1.49) | 0.96 (0.51 – 1.79)        | 0.803                    | 0.95 (0.74 – 1.22)                      |
| Trans fatty acid                                  | 0.75 (0.42 – 1.32)                    | 0.73 (0.40 – 1.33) | 1.13 (0.58 – 2.22)        | 0.782                    | 1.02 (0.75 – 1.39)                      |
| <b>Model 3 (Metabolic)</b>                        |                                       |                    |                           |                          |                                         |
| <u>Total protein</u>                              | 1.08 (0.66 – 1.75)                    | 0.87 (0.51 – 1.49) | 0.97 (0.55 – 1.72)        | 0.734                    | 0.99 (0.81 – 1.20)                      |
| Animal protein                                    | 1.57 (0.97 – 2.55)                    | 0.90 (0.49 – 1.65) | 1.20 (0.66 – 2.20)        | 0.960                    | 0.98 (0.79 – 1.22)                      |
| Vegetable protein                                 | 1.22 (0.71 – 2.09)                    | 1.10 (0.62 – 1.94) | 1.07 (0.59 – 1.94)        | 0.940                    | 1.04 (0.84 – 1.28)                      |
| <u>Total carbohydrate</u>                         | 1.21 (0.71 – 2.07)                    | 0.96 (0.54 – 1.73) | 0.96 (0.51 – 1.80)        | 0.721                    | 0.95 (0.77 – 1.19)                      |
| Mono-disaccharide                                 | 0.85 (0.50 – 1.45)                    | 0.81 (0.46 – 1.44) | 0.77 (0.41 – 1.48)        | 0.436                    | 0.94 (0.74 – 1.20)                      |
| Polysaccharide                                    | 1.06 (0.61 – 1.83)                    | 1.25 (0.72 – 2.18) | 0.74 (0.38 – 1.43)        | 0.560                    | 0.99 (0.79 – 1.24)                      |
| Fibre                                             | 0.79 (0.45 – 1.36)                    | 0.81 (0.45 – 1.45) | 0.89 (0.44 – 1.77)        | 0.743                    | 1.08 (0.83 – 1.40)                      |
| <u>Total fat</u>                                  | 1.01 (0.56 – 1.80)                    | 1.41 (0.80 – 2.48) | 1.69 (0.95 – 3.02)        | <b>0.038</b>             | 1.12 (0.92 – 1.35)                      |
| Saturated fat                                     | 0.95 (0.52 – 1.72)                    | 1.28 (0.67 – 2.44) | <b>2.21 (1.03 – 4.72)</b> | <b>0.030</b>             | 1.26 (0.89 – 1.78)                      |
| MUFA                                              | 1.20 (0.66 – 2.17)                    | 1.24 (0.65 – 2.38) | 1.49 (0.69 – 3.22)        | 0.342                    | 0.98 (0.73 – 1.30)                      |
| PUFA                                              | 1.04 (0.60 – 1.80)                    | 0.88 (0.49 – 1.56) | 0.98 (0.52 – 1.84)        | 0.804                    | 0.96 (0.74 – 1.24)                      |
| Trans fatty acid                                  | 0.74 (0.41 – 1.31)                    | 0.71 (0.39 – 1.31) | 1.10 (0.55 – 2.18)        | 0.862                    | 0.96 (0.70 – 1.32)                      |

**Supplementary Table 3: continued**

| <b>Overweight (BMI ≥ 25 kg/m<sup>2</sup>) n=2708</b> |                                       |                                       |                                       |                              |                                         |
|------------------------------------------------------|---------------------------------------|---------------------------------------|---------------------------------------|------------------------------|-----------------------------------------|
|                                                      | <b>Q2</b>                             | <b>Q3</b>                             | <b>Q4</b>                             | <b>P for trend</b>           | <b>Continuous<br/>(per SD increase)</b> |
| <b>Model 1 (Sociodemographic)</b>                    |                                       |                                       |                                       |                              |                                         |
| <u>Total protein</u>                                 | 1.17 (0.93 – 1.47)                    | <b>1.36 (1.09 – 1.69)<sup>‡</sup></b> | <b>1.49 (1.19 – 1.85)<sup>‡</sup></b> | <b>&lt;0.001<sup>‡</sup></b> | <b>1.16 (1.08 – 1.26)<sup>‡</sup></b>   |
| Animal protein                                       | <b>1.30 (1.03 – 1.64)</b>             | 1.16 (0.93 – 1.45)                    | <b>1.62 (1.28 – 2.05)<sup>‡</sup></b> | <b>&lt;0.001<sup>‡</sup></b> | <b>1.18 (1.08 – 1.28)<sup>‡</sup></b>   |
| Vegetable protein                                    | 1.08 (0.87 – 1.34)                    | 0.98 (0.78 – 1.22)                    | 1.25 (0.99 – 1.58)                    | 0.144                        | 1.08 (0.99 – 1.17)                      |
| <u>Total carbohydrate</u>                            | 0.93 (0.75 – 1.15)                    | <b>0.78 (0.63 – 0.98)</b>             | 0.86 (0.68 – 1.09)                    | 0.095                        | <b>0.91 (0.84 – 0.99)</b>               |
| Mono-disaccharide                                    | <b>0.73 (0.59 – 0.90)<sup>‡</sup></b> | <b>0.71 (0.57 – 0.89)<sup>‡</sup></b> | <b>0.67 (0.52 – 0.85)<sup>‡</sup></b> | <b>0.001<sup>‡</sup></b>     | <b>0.89 (0.81 – 0.97)<sup>‡</sup></b>   |
| Polysaccharide                                       | 1.01 (0.81 – 1.25)                    | 0.97 (0.78 – 1.22)                    | 0.90 (0.71 – 1.15)                    | 0.386                        | 1.00 (0.91 – 1.09)                      |
| Fibre                                                | 0.85 (0.68 – 1.06)                    | 1.00 (0.80 – 1.26)                    | 0.93 (0.73 – 1.18)                    | 0.910                        | 1.01 (0.92 – 1.10)                      |
| <u>Total fat</u>                                     | 0.98 (0.79 – 1.22)                    | 1.09 (0.88 – 1.36)                    | 1.10 (0.89 – 1.37)                    | 0.249                        | 1.03 (0.96 – 1.12)                      |
| Saturated fat                                        | 0.96 (0.76 – 1.21)                    | 0.95 (0.73 – 1.24)                    | 0.86 (0.62 – 1.19)                    | 0.406                        | 0.91 (0.78 – 1.06)                      |
| MUFA                                                 | 1.02 (0.81 – 1.30)                    | 0.96 (0.74 – 1.24)                    | 1.10 (0.80 – 1.50)                    | 0.727                        | 1.09 (0.96 – 1.25)                      |
| PUFA                                                 | 1.02 (0.82 – 1.27)                    | 0.97 (0.77 – 1.22)                    | 0.89 (0.68 – 1.15)                    | 0.351                        | 0.94 (0.84 – 1.04)                      |
| Trans fatty acid                                     | 0.93 (0.74 – 1.17)                    | 1.16 (0.90 – 1.48)                    | 1.21 (0.89 – 1.65)                    | 0.101                        | 1.12 (0.98 – 1.27)                      |
| <b>Model 2 (Lifestyle Confounding)</b>               |                                       |                                       |                                       |                              |                                         |
| <u>Total protein</u>                                 | 1.16 (0.92 – 1.46)                    | <b>1.32 (1.05 – 1.66)<sup>‡</sup></b> | <b>1.40 (1.11 – 1.77)<sup>‡</sup></b> | <b>0.003<sup>‡</sup></b>     | <b>1.14 (1.05 – 1.24)<sup>‡</sup></b>   |
| Animal protein                                       | <b>1.29 (1.02 – 1.63)</b>             | 1.13 (0.90 – 1.43)                    | <b>1.54 (1.20 – 1.98)<sup>‡</sup></b> | <b>0.004<sup>‡</sup></b>     | <b>1.14 (1.05 – 1.24)<sup>‡</sup></b>   |
| Vegetable protein                                    | 1.11 (0.89 – 1.38)                    | 1.01 (0.81 – 1.28)                    | <b>1.29 (1.01 – 1.66)</b>             | 0.094                        | <b>1.10 (1.00 – 1.20)</b>               |
| <u>Total carbohydrate</u>                            | 0.95 (0.76 – 1.18)                    | 0.84 (0.67 – 1.07)                    | 0.93 (0.72 – 1.21)                    | 0.435                        | 0.94 (0.86 – 1.03)                      |
| Mono-disaccharide                                    | <b>0.76 (0.61 – 0.95)</b>             | <b>0.76 (0.60 – 0.96)</b>             | <b>0.72 (0.55 – 0.94)<sup>‡</sup></b> | 0.022                        | 0.93 (0.84 – 1.02)                      |
| Polysaccharide                                       | 1.00 (0.80 – 1.25)                    | 0.95 (0.76 – 1.20)                    | 0.86 (0.67 – 1.11)                    | 0.233                        | 0.98 (0.89 – 1.07)                      |
| Fibre                                                | 0.91 (0.72 – 1.15)                    | 1.10 (0.85 – 1.42)                    | 1.07 (0.81 – 1.41)                    | 0.377                        | 1.06 (0.96 – 1.18)                      |
| <u>Total fat</u>                                     | 0.96 (0.77 – 1.20)                    | 1.04 (0.83 – 1.30)                    | 0.99 (0.78 – 1.25)                    | 0.896                        | 1.00 (0.92 – 1.09)                      |
| Saturated fat                                        | 0.93 (0.73 – 1.17)                    | 0.87 (0.67 – 1.14)                    | 0.74 (0.53 – 1.04)                    | 0.094                        | <b>0.84 (0.72 – 0.99)</b>               |
| MUFA                                                 | 1.04 (0.82 – 1.32)                    | 0.96 (0.74 – 1.24)                    | 1.09 (0.80 – 1.50)                    | 0.775                        | 1.12 (0.98 – 1.28)                      |
| PUFA                                                 | 1.02 (0.82 – 1.27)                    | 0.97 (0.77 – 1.22)                    | 0.86 (0.66 – 1.12)                    | 0.262                        | 0.93 (0.83 – 1.04)                      |
| Trans fatty acid                                     | 0.92 (0.73 – 1.16)                    | 1.15 (0.89 – 1.48)                    | 1.17 (0.85 – 1.59)                    | 0.161                        | 1.12 (0.98 – 1.27)                      |
| <b>Model 3 (Metabolic)</b>                           |                                       |                                       |                                       |                              |                                         |
| <u>Total protein</u>                                 | 1.14 (0.90 – 1.45)                    | 1.25 (0.99 – 1.59)                    | 1.22 (0.95 – 1.55)                    | 0.091                        | 1.09 (1.00 – 1.18)                      |
| Animal protein                                       | <b>1.31 (1.03 – 1.67)</b>             | 1.08 (0.84 – 1.67)                    | <b>1.36 (1.05 – 1.77)<sup>‡</sup></b> | 0.092                        | 1.09 (1.00 – 1.20)                      |
| Vegetable protein                                    | 1.11 (0.88 – 1.40)                    | 0.99 (0.78 – 1.26)                    | 1.23 (0.95 – 1.59)                    | 0.252                        | 1.07 (0.97 – 1.18)                      |
| <u>Total carbohydrate</u>                            | 1.05 (0.84 – 1.32)                    | 0.93 (0.73 – 1.19)                    | 1.06 (0.81 – 1.39)                    | 0.906                        | 0.97 (0.88 – 1.07)                      |
| Mono-disaccharide                                    | 0.80 (0.63 – 1.01)                    | 0.85 (0.66 – 1.09)                    | 0.83 (0.63 – 1.10)                    | 0.283                        | 0.98 (0.88 – 1.09)                      |
| Polysaccharide                                       | 0.93 (0.74 – 1.17)                    | 0.96 (0.75 – 1.22)                    | 0.83 (0.64 – 1.09)                    | 0.246                        | 0.97 (0.88 – 1.07)                      |
| Fibre                                                | 0.96 (0.76 – 1.23)                    | 1.17 (0.90 – 1.52)                    | 1.16 (0.86 – 1.55)                    | 0.181                        | 1.08 (0.97 – 1.20)                      |
| <u>Total fat</u>                                     | 1.01 (0.80 – 1.27)                    | 1.10 (0.87 – 1.39)                    | 0.98 (0.77 – 1.25)                    | 0.915                        | 0.99 (0.91 – 1.09)                      |
| Saturated fat                                        | 1.00 (0.78 – 1.28)                    | 0.99 (0.75 – 1.31)                    | 0.88 (0.62 – 1.26)                    | 0.547                        | 0.93 (0.78 – 1.09)                      |
| MUFA                                                 | 1.13 (0.88 – 1.45)                    | 1.00 (0.76 – 1.31)                    | 1.07 (0.77 – 1.48)                    | 0.958                        | 1.08 (0.94 – 1.24)                      |
| PUFA                                                 | 1.04 (0.83 – 1.31)                    | 0.93 (0.73 – 1.18)                    | 0.83 (0.63 – 1.10)                    | 0.142                        | 0.92 (0.82 – 1.03)                      |
| Trans fatty acid                                     | 0.94 (0.74 – 1.20)                    | 1.16 (0.89 – 1.51)                    | 1.08 (0.78 – 1.50)                    | 0.332                        | 1.07 (0.94 – 1.23)                      |

**Bold** values indicate  $P < 0.05$ . <sup>‡</sup> Indicates significant values using  $P < 0.021$ .

Model 1 (socio-demographic) is adjusted for age, gender, education level and study cohort

Model 2 (lifestyle confounding) is in addition previous model adjusted for past or current smoking, alcohol in E%, physical activity, energy intake and DHDI

Model 3 (metabolic) is in addition to the previous model adjusted for cholesterol, metabolic syndrome and diabetes mellitus

**Supplementary Table 4:** Substitution analyses of macronutrients in the metabolic model

| Substitution for:                   | Total population<br>n=3882 | P-value | Lean<br>n=1174     | P-value | Overweight<br>n=2708 | P-value |
|-------------------------------------|----------------------------|---------|--------------------|---------|----------------------|---------|
| <b>Total protein intake</b>         |                            |         |                    |         |                      |         |
| <u>Total carbohydrates</u>          | 1.00 (0.97 – 1.03)         | 0.946   | 0.98 (0.93 – 1.05) | 0.856   | 1.03 (1.00 – 1.06)   | 0.070   |
| Mono- di saccharides                | 1.00 (0.97 – 1.03)         | 0.954   | 0.99 (0.93 – 1.07) | 0.886   | 1.03 (1.00 – 1.06)   | 0.077   |
| Polysaccharides                     | 1.00 (0.97 – 1.03)         | 0.907   | 0.99 (0.92 – 1.07) | 0.782   | 1.03 (1.00 – 1.06)   | 0.085   |
| <u>Total fat</u>                    | 1.00 (0.97 – 1.03)         | 0.973   | 0.99 (0.92 – 1.06) | 0.690   | 1.03 (0.99 – 1.06)   | 0.115   |
| Saturated fat                       | 0.99 (0.92 – 1.06)         | 0.743   | 0.91 (0.77 – 1.07) | 0.255   | 1.05 (0.98 – 1.13)   | 0.166   |
| MUFA                                | 0.98 (0.94 – 1.03)         | 0.538   | 0.99 (0.89 – 1.11) | 0.916   | 0.99 (0.94 – 1.05)   | 0.820   |
| PUFA                                | 1.03 (0.97 – 1.09)         | 0.286   | 1.01 (0.88 – 1.17) | 0.873   | 1.06 (1.00 – 1.12)   | 0.056   |
| <u>Fibre</u>                        | 0.97 (0.85 – 1.10)         | 0.640   | 0.90 (0.65 – 1.26) | 0.548   | 0.96 (0.84 – 1.12)   | 0.572   |
| <b>Animal protein intake</b>        |                            |         |                    |         |                      |         |
| Vegetable protein                   | 1.00 (0.92 – 1.09)         | 0.944   | 1.03 (0.84 – 1.27) | 0.774   | 1.01 (0.92 – 1.11)   | 0.794   |
| <u>Total carbohydrates</u>          | 1.00 (0.97 – 1.03)         | 0.936   | 0.99 (0.93 – 1.06) | 0.855   | 1.03 (1.00 – 1.06)   | 0.069   |
| Mono- disaccharides                 | 1.00 (0.97 – 1.03)         | 0.977   | 1.00 (0.93 – 1.07) | 0.941   | 1.03 (1.00 – 1.06)   | 0.074   |
| Polysaccharides                     | 1.00 (0.97 – 1.04)         | 0.789   | 0.98 (0.90 – 1.07) | 0.643   | 1.03 (1.00 – 1.07)   | 0.131   |
| <u>Total fat</u>                    | 1.00 (0.97 – 1.03)         | 0.962   | 0.99 (0.92 – 1.06) | 0.688   | 1.03 (1.00 – 1.06)   | 0.115   |
| Saturated fat                       | 0.98 (0.92 – 1.05)         | 0.638   | 0.90 (0.76 – 1.60) | 0.219   | 1.06 (0.98 – 1.14)   | 0.145   |
| MUFA                                | 0.98 (0.93 – 1.03)         | 0.487   | 0.99 (0.89 – 1.11) | 0.876   | 1.00 (0.94 – 1.05)   | 0.866   |
| PUFA                                | 1.03 (0.98 – 1.09)         | 0.258   | 1.02 (0.88 – 1.18) | 0.811   | 1.06 (1.00 – 1.12)   | 0.062   |
| <u>Fibre</u>                        | 0.98 (0.86 – 1.13)         | 0.824   | 0.90 (0.63 – 1.31) | 0.592   | 0.96 (0.83 – 1.12)   | 0.628   |
| <b>Vegetable protein intake</b>     |                            |         |                    |         |                      |         |
| Animal protein                      | 1.01 (0.93 – 1.09)         | 0.868   | 0.98 (0.81 – 1.18) | 0.816   | 0.99 (0.92 – 1.08)   | 0.864   |
| <u>Total carbohydrates</u>          | 1.01 (0.93 – 1.09)         | 0.854   | 0.97 (0.80 – 1.19) | 0.785   | 1.02 (0.93 – 1.11)   | 0.714   |
| Mono- disaccharides                 | 1.02 (0.91 – 1.14)         | 0.747   | 0.93 (0.72 – 1.20) | 0.579   | 1.02 (0.91 – 1.14)   | 0.768   |
| Polysaccharides                     | 1.03 (0.90 – 1.16)         | 0.700   | 0.91 (0.68 – 1.24) | 0.561   | 1.02 (0.89 – 1.16)   | 0.792   |
| <u>Total fat</u>                    | 1.00 (0.92 – 1.09)         | 0.938   | 0.98 (0.80 – 1.21) | 0.849   | 1.00 (0.92 – 1.10)   | 0.924   |
| Saturated fat                       | 1.01 (0.92 – 1.12)         | 0.778   | 0.96 (0.75 – 1.22) | 0.749   | 1.04 (0.94 – 1.15)   | 0.454   |
| MUFA                                | 1.01 (0.92 – 1.11)         | 0.800   | 1.05 (0.83 – 1.31) | 0.697   | 0.99 (0.89 – 1.09)   | 0.764   |
| PUFA                                | 1.05 (0.95 – 1.17)         | 0.339   | 1.07 (0.82 – 1.40) | 0.621   | 1.03 (0.92 – 1.15)   | 0.584   |
| <u>Fibre</u>                        | 1.00 (0.84 – 1.18)         | 0.997   | 0.91 (0.58 – 1.42) | 0.673   | 0.97 (0.81 – 1.16)   | 0.704   |
| <b>Total carbohydrate intake</b>    |                            |         |                    |         |                      |         |
| <u>Total protein</u>                | 1.00 (0.97 – 1.03)         | 0.997   | 1.01 (0.94 – 1.08) | 0.848   | 0.97 (0.94 – 1.00)   | 0.070   |
| Animal protein                      | 1.00 (0.97 – 1.03)         | 0.995   | 1.01 (0.94 – 1.08) | 0.838   | 0.97 (0.94 – 1.00)   | 0.072   |
| Vegetable protein                   | 1.01 (0.91 – 1.10)         | 0.946   | 1.04 (0.83 – 1.30) | 0.739   | 0.99 (0.89 – 1.09)   | 0.768   |
| <u>Total fat</u>                    | 1.00 (0.98 – 1.01)         | 0.696   | 0.98 (0.95 – 1.01) | 0.230   | 1.00 (0.98 – 1.01)   | 0.707   |
| Saturated fat                       | 0.99 (0.94 – 1.04)         | 0.666   | 0.92 (0.82 – 1.04) | 0.179   | 1.02 (0.96 – 1.08)   | 0.499   |
| MUFA                                | 0.98 (0.95 – 1.02)         | 0.425   | 1.01 (0.92 – 1.10) | 0.891   | 0.96 (0.92 – 1.00)   | 0.076   |
| PUFA                                | 1.03 (0.98 – 1.08)         | 0.258   | 1.02 (0.91 – 1.15) | 0.703   | 1.02 (0.97 – 1.08)   | 0.406   |
| <u>Fibre</u>                        | 0.97 (0.85 – 1.10)         | 0.621   | 0.91 (0.66 – 1.26) | 0.559   | 0.94 (0.82 – 1.07)   | 0.324   |
| <b>Mono and disaccharide intake</b> |                            |         |                    |         |                      |         |
| Polysaccharides                     | 1.00 (0.98 – 1.02)         | 0.900   | 0.99 (0.95 – 1.04) | 0.802   | 1.00 (0.98 – 1.02)   | 0.829   |
| <u>Total protein</u>                | 1.00 (0.97 – 1.03)         | 0.985   | 1.01 (0.94 – 1.08) | 0.885   | 0.97 (0.94 – 1.00)   | 0.077   |
| Animal protein                      | 1.00 (0.97 – 1.03)         | 0.956   | 1.00 (0.93 – 1.08) | 0.934   | 0.97 (0.94 – 1.00)   | 0.076   |
| Vegetable protein                   | 1.00 (0.90 – 1.12)         | 0.985   | 1.07 (0.83 – 1.39) | 0.578   | 0.98 (0.87 – 1.11)   | 0.793   |
| <u>Total fat</u>                    | 1.00 (0.98 – 1.01)         | 0.725   | 0.98 (0.95 – 1.01) | 0.190   | 1.00 (0.98 – 1.01)   | 0.796   |
| Saturated fat                       | 0.99 (0.93 – 1.04)         | 0.632   | 0.90 (0.79 – 1.02) | 0.107   | 1.02 (0.97 – 1.09)   | 0.426   |
| MUFA                                | 0.98 (0.94 – 1.02)         | 0.410   | 1.00 (0.91 – 1.09) | 0.929   | 0.96 (0.92 – 1.01)   | 0.101   |
| PUFA                                | 1.03 (0.98 – 1.08)         | 0.260   | 1.02 (0.91 – 1.15) | 0.697   | 1.02 (0.97 – 1.08)   | 0.411   |
| <u>Fibre</u>                        | 0.97 (0.85 – 1.10)         | 0.616   | 0.91 (0.66 – 1.26) | 0.578   | 0.93 (0.82 – 1.06)   | 0.300   |



Supplementary Table 4: *continued*

| Substitution for:            | Total Population<br>n=3882 | P-value | Lean<br>n=1174     | P-value | Overweight<br>n=2708                  | P-value                  |
|------------------------------|----------------------------|---------|--------------------|---------|---------------------------------------|--------------------------|
| <b>Polysaccharide intake</b> |                            |         |                    |         |                                       |                          |
| Mono-and disaccharides       | 1.00 (0.98 – 1.02)         | 0.938   | 1.01 (0.96 – 1.05) | 0.800   | 1.00 (0.98 – 1.02)                    | 0.824                    |
| <u>Total protein</u>         | 1.00 (0.97 – 1.03)         | 0.974   | 1.01 (0.94 – 1.09) | 0.780   | 0.97 (0.94 – 1.00)                    | 0.084                    |
| Animal protein               | 1.00 (0.96 – 1.03)         | 0.867   | 1.02 (0.94 – 1.11) | 0.635   | 0.97 (0.94 – 1.01)                    | 0.135                    |
| Vegetable protein            | 1.00 (0.88 – 1.13)         | 0.995   | 1.09 (0.82 – 1.45) | 0.554   | 0.98 (0.86 – 1.12)                    | 0.820                    |
| <u>Total fat</u>             | 1.00 (0.98 – 1.02)         | 0.744   | 0.99 (0.95 – 1.04) | 0.730   | 0.99 (0.97 – 1.01)                    | 0.600                    |
| Saturated fat                | 0.99 (0.94 – 1.04)         | 0.658   | 0.92 (0.82 – 1.04) | 0.194   | 1.02 (0.96 – 1.08)                    | 0.506                    |
| MUFA                         | 0.98 (0.95 – 1.03)         | 0.458   | 1.02 (0.93 – 1.12) | 0.708   | 0.96 (0.92 – 1.00)                    | 0.067                    |
| PUFA                         | 1.03 (0.98 – 1.08)         | 0.298   | 1.04 (0.92 – 1.18) | 0.493   | 1.01 (0.96 – 1.07)                    | 0.603                    |
| <u>Fibre</u>                 | 0.97 (0.85 – 1.10)         | 0.619   | 0.92 (0.67 – 1.27) | 0.618   | 0.93 (0.82 – 1.06)                    | 0.297                    |
| <b>Total fat intake</b>      |                            |         |                    |         |                                       |                          |
| <u>Total carbohydrates</u>   | 1.00 (0.99 – 1.02)         | 0.669   | 1.02 (0.99 – 1.05) | 0.223   | 1.00 (0.99 – 1.02)                    | 0.712                    |
| Mono- di saccharides         | 1.00 (0.99 – 1.02)         | 0.696   | 1.02 (0.99 – 1.05) | 0.187   | 1.00 (0.99 – 1.02)                    | 0.799                    |
| Polysaccharides              | 1.00 (0.98 – 1.02)         | 0.701   | 1.01 (0.96 – 1.06) | 0.719   | 1.01 (0.99 – 1.03)                    | 0.604                    |
| <u>Total protein</u>         | 1.00 (0.97 – 1.03)         | 0.957   | 1.02 (0.95 – 1.09) | 0.657   | 0.97 (0.94 – 1.01)                    | 0.114                    |
| Animal protein               | 1.00 (0.97 – 1.03)         | 0.961   | 1.02 (0.95 – 1.09) | 0.652   | 0.97 (0.94 – 1.01)                    | 0.123                    |
| Vegetable protein            | 1.01 (0.92 – 1.11)         | 0.820   | 1.04 (0.83 – 1.30) | 0.730   | 1.00 (0.90 – 1.11)                    | 0.995                    |
| <u>Fibre</u>                 | 0.99 (0.88 – 1.11)         | 0.883   | 1.02 (0.75 – 1.37) | 0.915   | 0.95 (0.84 – 1.07)                    | 0.370                    |
| <b>Saturated fat intake</b>  |                            |         |                    |         |                                       |                          |
| MUFA                         | 0.99 (0.91 – 1.07)         | 0.794   | 1.10 (0.92 – 1.32) | 0.289   | 0.92 (0.85 – 1.01)                    | 0.066                    |
| PUFA                         | 1.04 (0.97 – 1.11)         | 0.277   | 1.12 (0.96 – 1.31) | 0.150   | 0.99 (0.92 – 1.06)                    | 0.773                    |
| <u>Total carbohydrates</u>   | 1.01 (0.95 – 1.06)         | 0.792   | 1.09 (0.97 – 1.24) | 0.150   | 0.96 (0.91 – 1.02)                    | 0.218                    |
| Mono- di saccharides         | 1.01 (0.95 – 1.07)         | 0.780   | 1.11 (0.98 – 1.27) | 0.105   | 0.96 (0.90 – 1.02)                    | 0.179                    |
| Polysaccharides              | 1.01 (0.95 – 1.06)         | 0.803   | 1.09 (0.96 – 1.23) | 0.188   | 0.97 (0.91 – 1.02)                    | 0.230                    |
| <u>Protein</u>               | 1.00 (0.94 – 1.08)         | 0.907   | 1.11 (0.94 – 1.31) | 0.209   | <b>0.93 (0.86 – 1.00)</b>             | <b>0.041</b>             |
| Animal protein               | 1.01 (0.94 – 1.08)         | 0.839   | 1.11 (0.95 – 1.31) | 0.197   | <b>0.93 (0.86 – 1.00)</b>             | <b>0.039</b>             |
| Vegetable protein            | 0.97 (0.87 – 1.07)         | 0.522   | 1.06 (0.82 – 1.38) | 0.650   | 0.91 (0.81 – 1.02)                    | 0.093                    |
| <u>Fibre</u>                 | 0.92 (0.81 – 1.05)         | 0.226   | 1.03 (0.74 – 1.43) | 0.876   | <b>0.83 (0.72 – 0.95)<sup>‡</sup></b> | <b>0.006<sup>‡</sup></b> |
| <b>MUFA intake</b>           |                            |         |                    |         |                                       |                          |
| Saturated fat                | 1.00 (0.93 – 1.08)         | 0.975   | 0.92 (0.77 – 1.10) | 0.357   | 1.05 (0.96 – 1.14)                    | 0.291                    |
| PUFA                         | 1.04 (0.96 – 1.13)         | 0.342   | 1.02 (0.84 – 1.23) | 0.834   | 1.05 (0.96 – 1.15)                    | 0.315                    |
| <u>Total carbohydrates</u>   | 1.01 (0.97 – 1.06)         | 0.502   | 1.00 (0.91 – 1.09) | 0.929   | 1.03 (0.99 – 1.08)                    | 0.166                    |
| Mono- di saccharides         | 1.01 (0.97 – 1.06)         | 0.498   | 1.00 (0.91 – 1.10) | 0.941   | 1.03 (0.98 – 1.08)                    | 0.206                    |
| Polysaccharides              | 1.01 (0.97 – 1.06)         | 0.553   | 0.98 (0.89 – 1.08) | 0.700   | 1.04 (0.99 – 1.08)                    | 0.149                    |
| <u>Total protein</u>         | 1.01 (0.97 – 1.06)         | 0.640   | 1.01 (0.91 – 1.12) | 0.875   | 0.99 (0.94 – 1.05)                    | 0.834                    |
| Animal protein               | 1.01 (0.97 – 1.06)         | 0.613   | 1.01 (0.91 – 1.12) | 0.863   | 0.99 (0.94 – 1.05)                    | 0.819                    |
| Vegetable protein            | 0.97 (0.88 – 1.07)         | 0.554   | 0.96 (0.76 – 1.22) | 0.747   | 0.97 (0.87 – 1.08)                    | 0.620                    |
| <u>Fibre</u>                 | 0.93 (0.82 – 1.05)         | 0.258   | 0.93 (0.67 – 1.30) | 0.686   | 0.89 (0.78 – 1.01)                    | 0.072                    |
| <b>PUFA intake</b>           |                            |         |                    |         |                                       |                          |
| Saturated fat                | 0.96 (0.90 – 1.02)         | 0.181   | 0.90 (0.78 – 1.05) | 0.183   | 0.98 (0.92 – 1.06)                    | 0.651                    |
| MUFA                         | 0.95 (0.87 – 1.03)         | 0.209   | 0.99 (0.82 – 1.19) | 0.903   | 0.92 (0.84 – 1.01)                    | 0.065                    |
| <u>Total carbohydrates</u>   | 0.97 (0.92 – 1.02)         | 0.183   | 0.98 (0.87 – 1.11) | 0.745   | 0.96 (0.91 – 1.02)                    | 0.172                    |
| Mono- di saccharides         | 0.97 (0.92 – 1.02)         | 0.182   | 0.97 (0.86 – 1.10) | 0.677   | 0.96 (0.91 – 1.02)                    | 0.191                    |
| Polysaccharides              | 0.96 (0.91 – 1.02)         | 0.204   | 0.95 (0.83 – 1.09) | 0.479   | 0.97 (0.91 – 1.03)                    | 0.290                    |
| <u>Total protein</u>         | 0.96 (0.91 – 1.02)         | 0.199   | 0.99 (0.86 – 1.14) | 0.921   | <b>0.93 (0.88 – 0.99)<sup>‡</sup></b> | <b>0.014<sup>‡</sup></b> |
| Animal protein               | 0.96 (0.91 – 1.02)         | 0.166   | 0.98 (0.85 – 1.14) | 0.821   | <b>0.93 (0.88 – 0.99)<sup>‡</sup></b> | <b>0.019<sup>‡</sup></b> |
| Vegetable protein            | 0.92 (0.82 – 1.03)         | 0.151   | 0.94 (0.70 – 1.26) | 0.667   | 0.91 (0.80 – 1.02)                    | 0.117                    |
| <u>Fibre</u>                 | 0.89 (0.77 – 1.02)         | 0.083   | 0.92 (0.65 – 1.30) | 0.652   | <b>0.83 (0.71 – 0.95)<sup>‡</sup></b> | <b>0.009<sup>‡</sup></b> |

**Bold** values indicate  $P < 0.05$ . <sup>‡</sup>Indicates significant values using  $P < 0.021$ .

Substitution model was performed adjusted for age, gender, education level, study cohort, past or current smoking, alcohol in E%, physical activity, energy intake, DHDl, cholesterol, metabolic syndrome, diabetes mellitus and for log-transformed BMI in the overall group.

**Supplementary Table 5:** Complete case analyses

| Overall n=3259                                       |                           |                    |                                       |              |                              |
|------------------------------------------------------|---------------------------|--------------------|---------------------------------------|--------------|------------------------------|
|                                                      | Q2                        | Q3                 | Q4                                    | P for trend  | Continuous (per SD increase) |
| <b>Model 4 (Metabolic + log-transformed BMI)</b>     |                           |                    |                                       |              |                              |
| <u>Total protein</u>                                 | 1.11 (0.87 – 1.42)        | 1.16 (0.91 – 1.48) | 1.04 (0.80 – 1.34)                    | 0.741        | 1.02 (0.93 – 1.12)           |
| Animal protein                                       | 1.30 (1.01 – 1.66)        | 0.99 (0.77 – 1.27) | 1.23 (0.94 – 1.61)                    | 0.480        | 1.02 (0.92 – 1.13)           |
| Vegetable protein                                    | 0.95 (0.75 – 1.21)        | 0.81 (0.63 – 1.04) | 0.99 (0.76 – 1.30)                    | 0.633        | 1.02 (0.93 – 1.13)           |
| <u>Total carbohydrate</u>                            | 1.22 (0.96 – 1.56)        | 1.10 (0.85 – 1.43) | 1.24 (0.94 – 1.64)                    | 0.241        | 1.04 (0.94 – 1.15)           |
| Mono-disaccharide                                    | 0.83 (0.65 – 1.06)        | 0.96 (0.74 – 1.25) | 0.97 (0.72 – 1.30)                    | 0.891        | 1.04 (0.93 – 1.16)           |
| Polysaccharide                                       | 0.97 (0.76 – 1.23)        | 1.04 (0.82 – 1.34) | 0.83 (0.63 – 1.09)                    | 0.320        | 1.02 (0.92 – 1.12)           |
| Fibre                                                | 0.88 (0.68 – 1.13)        | 1.03 (0.78 – 1.35) | 1.00 (0.73 – 1.36)                    | 0.697        | 1.01 (0.90 – 1.14)           |
| <u>Total fat</u>                                     | 1.17 (0.92 – 1.48)        | 1.15 (0.90 – 1.46) | 1.03 (0.79 – 1.33)                    | 0.840        | 0.98 (0.89 – 1.08)           |
| Saturated fat                                        | 1.02 (0.79 – 1.32)        | 1.07 (0.80 – 1.43) | 1.02 (0.71 – 1.48)                    | 0.837        | 0.98 (0.83 – 1.17)           |
| MUFA                                                 | <b>1.32 (1.02 – 1.70)</b> | 1.15 (0.86 – 1.53) | 1.29 (0.92 – 1.83)                    | 0.326        | 1.05 (0.90 – 1.22)           |
| PUFA                                                 | 1.06 (0.84 – 1.35)        | 0.90 (0.70 – 1.16) | 0.92 (0.69 – 1.23)                    | 0.342        | 0.92 (0.81 – 1.03)           |
| Trans fatty acid                                     | 0.98 (0.76 – 1.26)        | 1.07 (0.82 – 1.41) | 1.02 (0.72 – 1.43)                    | 0.745        | 1.01 (0.88 – 1.17)           |
| <b>Lean (BMI &lt; 25 kg/m<sup>2</sup>) n=1011</b>    |                           |                    |                                       |              |                              |
|                                                      | Q2                        | Q3                 | Q4                                    | P for trend  | Continuous (per SD increase) |
| <b>Model 3 (Metabolic)</b>                           |                           |                    |                                       |              |                              |
| <u>Total protein</u>                                 | 1.02 (0.60 – 1.74)        | 0.97 (0.55 – 1.72) | 0.85 (0.45 – 1.61)                    | 0.636        | 0.98 (0.79 – 1.22)           |
| Animal protein                                       | 1.53 (0.90 – 2.59)        | 0.83 (0.42 – 1.62) | 1.13 (0.58 – 2.22)                    | 0.839        | 0.98 (0.78 – 1.24)           |
| Vegetable protein                                    | 1.16 (0.65 – 2.09)        | 0.89 (0.47 – 1.68) | 0.99 (0.52 – 1.90)                    | 0.770        | 1.03 (0.81 – 1.30)           |
| <u>Total carbohydrate</u>                            | 1.15 (0.64 – 2.08)        | 0.95 (0.50 – 1.82) | 1.01 (0.50 – 2.02)                    | 0.877        | 0.99 (0.77 – 1.26)           |
| Mono-disaccharide                                    | 0.89 (0.49 – 1.61)        | 0.84 (0.44 – 1.60) | 0.88 (0.43 – 1.81)                    | 0.719        | 0.97 (0.74 – 1.27)           |
| Polysaccharide                                       | 1.28 (0.69 – 2.35)        | 1.49 (0.81 – 2.76) | 0.78 (0.36 – 1.65)                    | 0.735        | 1.00 (0.78 – 1.29)           |
| Fibre                                                | 0.67 (0.36 – 1.22)        | 0.70 (0.36 – 1.34) | 0.81 (0.38 – 1.72)                    | 0.614        | 1.04 (0.78 – 1.39)           |
| <u>Total fat</u>                                     | 1.11 (0.59 – 2.09)        | 1.31 (0.70 – 2.44) | 1.77 (0.94 – 3.33)                    | 0.064        | 1.10 (0.89 – 1.37)           |
| Saturated fat                                        | 0.91 (0.47 – 1.75)        | 1.13 (0.55 – 2.32) | <b>2.67 (1.16 – 6.19)</b>             | <b>0.022</b> | 1.34 (0.91 – 1.97)           |
| MUFA                                                 | 1.17 (0.61 – 2.23)        | 1.12 (0.55 – 2.30) | 1.52 (0.65 – 3.52)                    | 0.388        | 0.92 (0.67 – 1.26)           |
| PUFA                                                 | 1.00 (0.55 – 1.83)        | 0.95 (0.51 – 1.79) | 1.12 (0.57 – 2.23)                    | 0.788        | 1.02 (0.77 – 1.36)           |
| Trans fatty acid                                     | 0.77 (0.41 – 1.44)        | 0.64 (0.32 – 1.26) | 1.10 (0.51 – 2.36)                    | 0.976        | 0.91 (0.63 – 1.31)           |
| <b>Overweight (BMI ≥ 25 kg/m<sup>2</sup>) n=2248</b> |                           |                    |                                       |              |                              |
|                                                      | Q2                        | Q3                 | Q4                                    | P for trend  | Continuous (per SD increase) |
| <b>Model 3 (Metabolic)</b>                           |                           |                    |                                       |              |                              |
| <u>Total protein</u>                                 | 1.15 (0.89 – 1.50)        | 1.26 (0.97 – 1.64) | <b>1.34 (1.02 – 1.76)</b>             | <b>0.028</b> | <b>1.12 (1.02 – 1.23)</b>    |
| Animal protein                                       | 1.29 (0.99 – 1.68)        | 1.05 (0.80 – 1.37) | <b>1.52 (1.14 – 2.03)<sup>†</sup></b> | <b>0.027</b> | <b>1.13 (1.02 – 1.25)</b>    |
| Vegetable protein                                    | 0.98 (0.76 – 1.26)        | 0.83 (0.64 – 1.08) | 1.13 (0.85 – 1.50)                    | 0.735        | 1.06 (0.95 – 1.17)           |
| <u>Total carbohydrate</u>                            | 1.13 (0.88 – 1.46)        | 0.99 (0.76 – 1.29) | 1.11 (0.83 – 1.48)                    | 0.701        | 0.99 (0.89 – 1.11)           |
| Mono-disaccharide                                    | 0.75 (0.58 – 0.97)        | 0.78 (0.59 – 1.02) | 0.84 (0.62 – 1.14)                    | 0.324        | 1.00 (0.89 – 1.12)           |
| Polysaccharide                                       | 0.89 (0.69 – 1.14)        | 0.95 (0.73 – 1.23) | 0.80 (0.60 – 1.07)                    | 0.222        | 0.98 (0.88 – 1.09)           |
| Fibre                                                | 0.95 (0.73 – 1.25)        | 1.13 (0.84 – 1.51) | 1.10 (0.80 – 1.52)                    | 0.354        | 1.04 (0.92 – 1.17)           |
| <u>Total fat</u>                                     | 1.10 (0.86 – 1.42)        | 1.09 (0.85 – 1.41) | 0.94 (0.72 – 1.23)                    | 0.713        | 0.97 (0.88 – 1.07)           |
| Saturated fat                                        | 1.01 (0.78 – 1.33)        | 1.01 (0.74 – 1.37) | 0.78 (0.53 – 1.16)                    | 0.292        | 0.90 (0.75 – 1.08)           |
| MUFA                                                 | 1.26 (0.96 – 1.66)        | 1.12 (0.83 – 1.51) | 1.21 (0.84 – 1.75)                    | 0.511        | 1.12 (0.95 – 1.32)           |
| PUFA                                                 | 0.98 (0.76 – 1.26)        | 0.83 (0.63 – 1.08) | 0.82 (0.60 – 1.12)                    | 0.120        | 0.88 (0.78 – 1.01)           |
| Trans fatty acid                                     | 1.02 (0.79 – 1.34)        | 1.16 (0.87 – 1.55) | 1.02 (0.71 – 1.46)                    | 0.678        | 1.05 (0.90 – 1.23)           |



**Supplementary Table 5: Legend**

**Bold** values indicate  $P < 0.05$ . †Indicates significant values using  $P < 0.021$ .

Model 3 (metabolic) is in addition to the previous model adjusted for cholesterol, metabolic syndrome and diabetes mellitus

Model 4 (metabolic + log-transformed BMI) is in addition to the previous model adjusted for log-transformed BMI

**Supplementary Table 6:** Characteristics of imputed and complete cases

|                                | <b>Complete cases<br/>(n=3259)</b> | <b>Imputed cases<br/>(n=623)</b> | <b>*P-value</b> |
|--------------------------------|------------------------------------|----------------------------------|-----------------|
| Age (years)                    | 69.5 ± 8.6                         | 71.1 ± 9.7                       | <0.001          |
| Female (%)                     | 60.4                               | 47.0                             | <0.001          |
| Caucasian (%)                  | 97.8                               | 97.0                             | 0.256           |
| RS cohort I / II / III (%)     | 26.6 / 30.5 / 42.9                 | 32.4 / 30.2 / 37.4               | 0.006           |
| <u>Education Level (%)</u>     |                                    |                                  |                 |
| Low                            | 48.2                               | 49.4                             | 0.287           |
| Intermediate                   | 30.1                               | 31.8                             |                 |
| High                           | 21.7                               | 18.8                             |                 |
| <u>Smoking status (%)</u>      |                                    |                                  |                 |
| Never / Past or Current        | 37.2 / 62.8                        | 33.6 / 66.4                      | 0.151           |
| Alcohol (units/d)              | 0.45 (0.06 – 1.19)                 | 0.40 (0.03 – 1.21)               | 0.439           |
| Physical Activity <sup>†</sup> | 41.5 (15.8 – 79.0)                 | 36.3 (18.0 – 73.9)               | 0.645           |
| Caloric Intake (kcal/day)      | 2040 (1636 – 2514)                 | 1976 (1541 – 2525)               | 0.079           |
| <u>BMI (kg/m<sup>2</sup>)</u>  | 26.8 (24.4 – 29.5)                 | 27.4 (24.8 – 30.6)               | <0.001          |
| Lean                           | 31.0                               | 26.2                             | 0.015           |
| Overweight                     | 69.0                               | 73.8                             |                 |
| ALT (U/L)                      | 18 (15 – 24)                       | 18 (15 – 24)                     | 0.607           |
| HOMA-IR                        | 2.6 (1.7 – 4.0)                    | 2.7 (1.8 – 4.3)                  | 0.099           |
| Total Cholesterol (mmol/L)     | 5.4 ± 1.1                          | 5.3 ± 1.1                        | 0.016           |
| Metabolic Syndrome (%)         | 51.3                               | 55.0                             | 0.102           |
| Hypertension (%)               | 73.6                               | 76.1                             | 0.192           |
| Diabetes Mellitus (%)          | 12.4                               | 17.3                             | 0.001           |
| NAFLD (%)                      | 33.7                               | 38.4                             | 0.025           |

Data on imputed cases is original data, not imputed on the present variables. Data represent % for categorical variables and for continuous variables mean ± SD or median (P25 – P75). \*P-value is based on T-test, Wilcoxon rank sum test, Chi-square test or Fisher's exact test. <sup>†</sup>Physical activity in metabolic equivalent task hours/week.

**Supplementary Table 7:** Sensitivity analyses using RS-cohort I and II in which FFQs were completed at the same time as all other measurements, amongst them abdominal ultrasound

| RS I and II only n=2252                                            |                           |                                       |                    |             |                                 |
|--------------------------------------------------------------------|---------------------------|---------------------------------------|--------------------|-------------|---------------------------------|
|                                                                    | Q2                        | Q3                                    | Q4                 | P for trend | Continuous<br>(per SD increase) |
| <b>Model 4 (Metabolic + log-transformed BMI)</b>                   |                           |                                       |                    |             |                                 |
| Total protein                                                      | 1.08 (0.80 – 1.45)        | 1.02 (0.76 – 1.37)                    | 0.92 (0.68 – 1.25) | 0.537       | 0.97 (0.88 – 1.07)              |
| Animal protein                                                     | 1.27 (0.93 – 1.72)        | 0.99 (0.73 – 1.34)                    | 1.11 (0.80 – 1.53) | 0.949       | 0.97 (0.87 – 1.08)              |
| Vegetable protein                                                  | 0.91 (0.69 – 1.20)        | 0.79 (0.59 – 1.06)                    | 1.08 (0.78 – 1.49) | 0.951       | 1.01 (0.89 – 1.13)              |
| Total carbohydrate                                                 | <b>1.35 (1.01 – 1.80)</b> | 1.20 (0.88 – 1.64)                    | 1.18 (0.84 – 1.65) | 0.493       | 1.02 (0.91 – 1.15)              |
| Mono-disaccharide                                                  | 0.91 (0.68 – 1.23)        | 1.02 (0.74 – 1.40)                    | 0.91 (0.65 – 1.30) | 0.786       | 1.03 (0.91 – 1.17)              |
| Polysaccharide                                                     | 0.92 (0.70 – 1.22)        | 0.90 (0.67 – 1.21)                    | 0.88 (0.63 – 1.24) | 0.454       | 0.99 (0.88 – 1.12)              |
| Fibre                                                              | 0.94 (0.69 – 1.27)        | 1.13 (0.81 – 1.56)                    | 1.03 (0.71 – 1.50) | 0.624       | 1.06 (0.92 – 1.21)              |
| Total fat                                                          | 1.19 (0.89 – 1.59)        | <b>1.42 (1.06 – 1.90)<sup>‡</sup></b> | 1.16 (0.86 – 1.57) | 0.180       | 1.03 (0.93 – 1.15)              |
| Saturated fat                                                      | 1.10 (0.80 – 1.51)        | 1.24 (0.88 – 1.76)                    | 1.16 (0.75 – 1.79) | 0.398       | 1.04 (0.85 – 1.27)              |
| MUFA                                                               | 1.34 (0.99 – 1.82)        | 1.16 (0.82 – 1.64)                    | 1.01 (0.67 – 1.53) | 0.850       | 0.96 (0.81 – 1.13)              |
| PUFA                                                               | 1.28 (0.97 – 1.70)        | 1.04 (0.77 – 1.41)                    | 0.99 (0.70 – 1.39) | 0.728       | 1.00 (0.87 – 1.14)              |
| Trans fatty acid                                                   | 0.97 (0.71 – 1.32)        | 1.20 (0.87 – 1.67)                    | 1.26 (0.84 – 1.90) | 0.158       | 1.08 (0.91 – 1.28)              |
| <b>Lean (BMI &lt; 25 kg/m<sup>2</sup>) in RSI and II n=664</b>     |                           |                                       |                    |             |                                 |
|                                                                    | Q2                        | Q3                                    | Q4                 | P for trend | Continuous<br>(per SD increase) |
| <b>Model 3 (Metabolic)</b>                                         |                           |                                       |                    |             |                                 |
| Total protein                                                      | 1.51 (0.81 – 2.85)        | 0.84 (0.40 – 1.79)                    | 1.07 (0.50 – 2.32) | 0.817       | 0.95 (0.74 – 1.23)              |
| Animal protein                                                     | 1.64 (0.85 – 3.17)        | 0.86 (0.37 – 1.97)                    | 1.20 (0.54 – 2.64) | 0.998       | 0.95 (0.72 – 1.25)              |
| Vegetable protein                                                  | 0.89 (0.45 – 1.77)        | 0.77 (0.37 – 1.61)                    | 1.16 (0.53 – 2.52) | 0.897       | 1.02 (0.77 – 1.36)              |
| Total carbohydrate                                                 | 1.00 (0.47 – 2.13)        | 1.44 (0.67 – 3.10)                    | 1.04 (0.45 – 2.43) | 0.729       | 1.00 (0.75 – 1.35)              |
| Mono-disaccharide                                                  | 0.68 (0.32 – 1.46)        | 0.82 (0.37 – 1.81)                    | 0.82 (0.35 – 1.94) | 0.794       | 1.02 (0.74 – 1.40)              |
| Polysaccharide                                                     | 0.83 (0.41 – 1.65)        | 0.90 (0.43 – 1.90)                    | 0.69 (0.29 – 1.64) | 0.482       | 0.98 (0.72 – 1.34)              |
| Fibre                                                              | 0.83 (0.40 – 1.74)        | 0.99 (0.44 – 2.24)                    | 1.12 (0.43 – 2.91) | 0.730       | 1.16 (0.80 – 1.66)              |
| Total fat                                                          | 1.15 (0.55 – 2.39)        | 1.44 (0.70 – 2.98)                    | 1.33 (0.61 – 2.87) | 0.386       | 1.07 (0.84 – 1.37)              |
| Saturated fat                                                      | 0.87 (0.39 – 1.92)        | 1.08 (0.45 – 2.60)                    | 2.19 (0.80 – 6.01) | 0.119       | 1.44 (0.91 – 2.26)              |
| MUFA                                                               | 1.50 (0.72 – 3.14)        | 1.04 (0.45 – 2.44)                    | 1.05 (0.37 – 3.00) | 0.850       | 0.83 (0.56 – 1.23)              |
| PUFA                                                               | 0.93 (0.45 – 1.90)        | 1.03 (0.49 – 2.16)                    | 0.94 (0.40 – 2.23) | 0.964       | 1.03 (0.73 – 1.45)              |
| Trans fatty acid                                                   | 0.85 (0.40 – 1.83)        | 0.66 (0.28 – 1.54)                    | 1.07 (0.41 – 2.77) | 0.947       | 0.91 (0.61 – 1.36)              |
| <b>Overweight (BMI ≥ 25 kg/m<sup>2</sup>) in RSI and II n=1588</b> |                           |                                       |                    |             |                                 |
|                                                                    | Q2                        | Q3                                    | Q4                 | P for trend | Continuous<br>(per SD increase) |
| <b>Model 3 (Metabolic)</b>                                         |                           |                                       |                    |             |                                 |
| Total protein                                                      | 1.03 (0.75 – 1.41)        | 1.12 (0.82 – 1.53)                    | 1.16 (0.85 – 1.59) | 0.282       | 1.07 (0.96 – 1.18)              |
| Animal protein                                                     | 1.29 (0.93 – 1.78)        | 1.07 (0.78 – 1.47)                    | 1.33 (0.95 – 1.85) | 0.229       | 1.07 (0.96 – 1.20)              |
| Vegetable protein                                                  | 0.99 (0.74 – 1.31)        | 0.85 (0.63 – 1.16)                    | 1.17 (0.84 – 1.64) | 0.675       | 1.03 (0.91 – 1.16)              |
| Total carbohydrate                                                 | 1.30 (0.96 – 1.75)        | 0.96 (0.69 – 1.32)                    | 1.04 (0.73 – 1.47) | 0.747       | 0.97 (0.86 – 1.09)              |
| Mono-disaccharide                                                  | 0.93 (0.68 – 1.27)        | 0.88 (0.64 – 1.23)                    | 0.81 (0.57 – 1.16) | 0.251       | 0.98 (0.86 – 1.11)              |
| Polysaccharide                                                     | 0.89 (0.67 – 1.19)        | 0.84 (0.62 – 1.15)                    | 0.88 (0.62 – 1.25) | 0.388       | 0.96 (0.85 – 1.08)              |
| Fibre                                                              | 1.01 (0.73 – 1.38)        | 1.19 (0.85 – 1.68)                    | 1.08 (0.74 – 1.59) | 0.517       | 1.08 (0.94 – 1.24)              |
| Total fat                                                          | 1.05 (0.78 – 1.41)        | 1.33 (0.98 – 1.79)                    | 1.08 (0.79 – 1.47) | 0.345       | 1.02 (0.91 – 1.14)              |
| Saturated fat                                                      | 1.08 (0.78 – 1.49)        | 1.20 (0.84 – 1.71)                    | 0.94 (0.60 – 1.47) | 0.996       | 0.93 (0.75 – 1.15)              |
| MUFA                                                               | 1.23 (0.89 – 1.69)        | 1.20 (0.84 – 1.71)                    | 1.04 (0.68 – 1.60) | 0.885       | 1.07 (0.90 – 1.27)              |
| PUFA                                                               | 1.22 (0.91 – 1.64)        | 0.93 (0.68 – 1.28)                    | 0.85 (0.60 – 1.21) | 0.221       | 0.93 (0.81 – 1.08)              |
| Trans fatty acid                                                   | 0.97 (0.71 – 1.33)        | 1.26 (0.90 – 1.77)                    | 1.29 (0.84 – 1.96) | 0.124       | 1.11 (0.93 – 1.33)              |

**Supplementary Table 7: Legend**

**Bold** values indicate  $P < 0.05$ . †Indicates significant values using  $P < 0.021$ .

Model 3 (metabolic) is in addition to the previous model adjusted for cholesterol, metabolic syndrome and diabetes mellitus

Model 4 (metabolic + log-transformed BMI) is in addition to the previous model adjusted for log-transformed BMI
